# Supplementary material for: Application of comprehensive evaluation framework to Coronavirus Disease 19 studies: A systematic review of translational aspects of artificial intelligence in health care
Source: medRxiv preprint, doi:10.1101/2023.02.23.23286374, version 1 (2023-02-26)
Supplement: Multimedia Appendix 1 [file 286374_file02.docx]

**Identification of studies via databases and registers**

Records removed before screening:

Duplicate records removed (n = 1446)

Records identified from databases:

MEDLINE (n = 2389)

Embase (n = 1897)

iSearch COVID-19 portfolio (n = 990)

Total (n = 5276)

**Identification**

Records screened

(n = 3830)

Records excluded

(n = 2862)

Reports relevant and eligible for evaluation

(n = 968)

Reports not randomly selected for evaluation (n = 845)

**Screening**

Reports excluded from evaluation:

Did not address a healthcare problem (n = 11 )

Did not use artificial intelligence (n = 7)

Wrong study type (n = 2)

Reports randomly selected for evaluation (n = 123)

Studies included in evaluation

(n = 102)

**Included**
